# Supplementary material
Source: publisher site journal article supplement (https://www.dovepress.com/article/409662)
Supplement: Supplementary file 1 [file get_supplementary_file.php]

## Supplementary Materials

**Supplementary Table 1. Interpretation of the calculated Kappa coefficient.**

| Kappa value | Interpretation |
|-------------|----------------|
| >0.8        | Almost perfect |
| >0.6        | Substantial    |
| >0.4        | Moderate       |
| >0.2        | Fair           |
| 0–0.2       | Slight         |
| <0          | Poor           |

**Supplementary Table 2. Consistency between DCG and DE in all cases.**

| Number of LPs by the degree of obstruction |          |        |         |          | Weighted Cohen's Kappa | Standard Error | 95% CI    | <i>p</i> |       |
|--------------------------------------------|----------|--------|---------|----------|------------------------|----------------|-----------|----------|-------|
| DE                                         | DCG      |        |         |          | 0.58                   | 0.04           | 0.49–0.66 | <.001    |       |
|                                            |          | patent | partial | complete |                        |                |           |          | Total |
|                                            | patent   | 38     | 0       | 0        |                        |                |           |          | 38    |
|                                            | partial  | 58     | 4       | 2        |                        |                |           |          | 64    |
|                                            | complete | 10     | 2       | 74       |                        |                |           |          | 86    |
| Total                                      | 106      | 6      | 76      | 188      |                        |                |           |          |       |

The values represent the number of LPs. Partial and complete refers to partial and complete obstruction, respectively. Abbreviation: DCG, dacryocystography; DE, dacryoendoscopy; LP, lacrimal pathway

**Supplementary Figure 1. Dacryoendoscope with a bent-tip probe and a curve-tipped probe.**

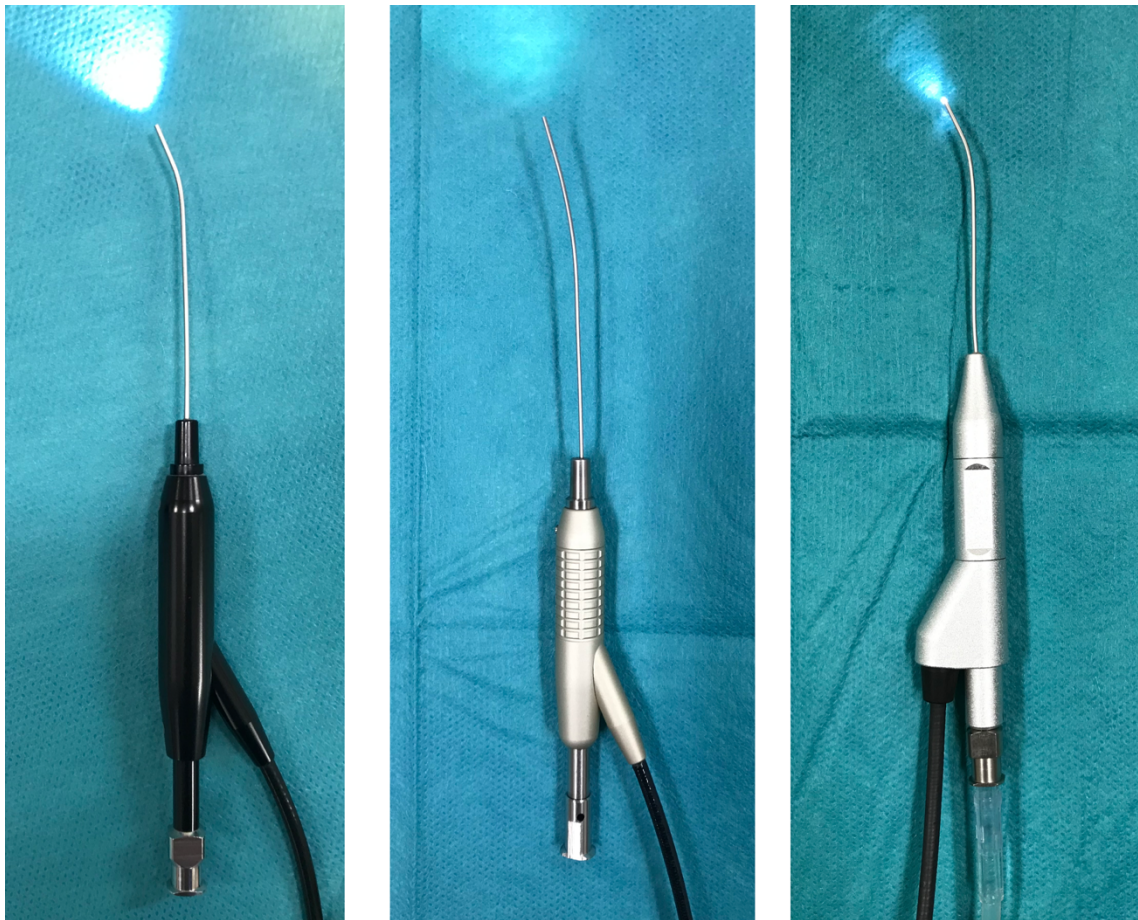

**Left:** CK10 (FiberTech Co., Ltd., Tokyo, Japan); external diameter, 0.9mm; field of view, 60°; image quality, 10,000 pixels

**Middle:** CH15C (FiberTech Co., Ltd., Tokyo, Japan); external diameter, 0.82 mm; field of view, 70°; image quality, 15,000 pixels

**Right:** LAC-06-FY (Machida Endoscope Co., Ltd., Chiba, Japan); external diameter, 0.9 mm; field of view, 65°; image quality, 15,000 pixels
